# Supplementary material for: Dual-strategy engineered nickel phosphide for achieving efficient hydrazine-assisted hydrogen production in seawater
Source: Royal Society of Chemistry journal article supplement (doi:10.1039/d4sc01160k), 2024-01-01
Supplement: d4sc01160k1.pdf [file d4sc01160k1.pdf]

## **Dual-strategy engineered nickel phosphide for achieving efficient hydrazine-assisted hydrogen production in seawater**

Rui-Qing Li,<sup>\*a</sup> Songyun Guo,<sup>a</sup> Xiaojun Wang,<sup>a</sup> Xiaoyu Wan,<sup>a</sup> Shuixiang Xie,<sup>a</sup> Yu Liu,<sup>a</sup> Changming Wang,<sup>a</sup> Guangyu Zhang,<sup>a</sup> Jun Cao<sup>\*b</sup> Jiamu Dai,<sup>a</sup> Mingzheng Ge<sup>a</sup> and Wei Zhang<sup>\*a</sup>

<sup>a</sup> School of Textile and Clothing, Nantong University, Nantong 226019, PR China

<sup>b</sup> Department of Physics, Zhejiang Sci-Tech University, Hangzhou 310018, PR China

\*Corresponding authors

E-mail: liruiqing@ntu.edu.cn; caojun2021@zstu.edu.cn; zhangwei@ntu.edu.cn

## Experimental

**Reagents and Materials.**  $\text{Ni}(\text{NO}_3)_2 \cdot 6\text{H}_2\text{O}$ ,  $\text{Fe}(\text{NO}_3)_2 \cdot 6\text{H}_2\text{O}$ ,  $\text{NaH}_2\text{PO}_4$ ,  $\text{Na}_2\text{HPO}_4$ ,  $\text{NH}_4\text{F}$ ,  $\text{Ce}(\text{NO}_3)_2 \cdot 6\text{H}_2\text{O}$ ,  $\text{NaH}_2\text{PO}_2$ ,  $\text{HCl}$ , hydrazine, ethanol and urea were obtained from Sinopharm Chemical Reagent Co. Ltd. KOH was purchased from Adamas-beta®.

**Synthesis of Fe-Ni<sub>2</sub>P/CeO<sub>2</sub>.** Typically,  $\text{Ni}(\text{NO}_3)_2$  (1.7 mmol),  $\text{Fe}(\text{NO}_3)_2$  (0.3 mmol),  $\text{Ce}(\text{NO}_3)_2$  (0.2 mmol), urea (10 mmol) and  $\text{NH}_4\text{F}$  (6 mmol) were dissolved in 35 mL water to gain homogeneous solution. Then, a piece of pretreated NF was immersed into above solution, and reacted at 120 °C to obtain NiFeCe layer double hydroxide (NiFeCe LDH) precursor. After that, the Fe-Ni<sub>2</sub>P/CeO<sub>2</sub> product can be yielded by the phosphorization process at 300 °C with NiFeCe LDH and  $\text{NaH}_2\text{PO}_2$  as precursor and phosphorus source. The control Ni<sub>2</sub>P and Fe-Ni<sub>2</sub>P samples were prepared in a similar procedure in the absence of  $\text{Fe}(\text{NO}_3)_2$ ,  $\text{Ce}(\text{NO}_3)_2$  and  $\text{Ce}(\text{NO}_3)_2$ , respectively.

**Materials characterization.** The X-ray diffraction (XRD), scanning electron microscopy (SEM), transmission electron microscopy (TEM) and X-ray photoelectron spectrometer (XPS) were performed on the Bruker D8, FIB-SEM GX4, FEI Tecnai G20 instruments and Thermo ESCALAB 250 to research detailed phases, morphology, chemical composition and valences of synthesized samples.

**Electrochemical measurements.** Electrochemical behaviors were assessed on an electrochemical station (CHI 760E) employing a typical three-electrode system with graphite rod, saturated calomel electrode and synthesized samples as counter, reference and working electrodes in 1 M KOH seawater without and with 0.1-0.7 M  $\text{N}_2\text{H}_4$  and 1 M PBS buffered seawater solution. For electrocatalytic tests in seawater, natural seawater was acquired from the Huanghai Sea, which was filtered to remove some impurities. The polarization curves were conducted at a scan rate of 2 mV s<sup>-1</sup> and the corresponding potentials were calibrated to standard potentials via the Nernst equation. The electrochemical impedance spectroscopy was measured in the frequency varying from 0.01 Hz to 100 kHz, respectively.

**Theoretical calculations.** The density functional theory calculations were carried out employing the Vienna Ab-initio Simulation Package (VASP) software.<sup>1,2</sup> The generalized gradient approximation by Perdew-Burke-Ernzerhor was applied to exchange-correlation energy.<sup>3,4</sup> The Kohn-Sham one-electron states were expanded using plane wave basis set with kinetic cutoff energy (500 eV). The active Fe-Ni<sub>2</sub>P/CeO<sub>2</sub> surface was simulated by a periodic six-layer slab repeated in 2 × 1 surface unit cell. The Brillouin-zone integration was carried out by Gamma sampling method. A vacuum layer of 15 Å was adopted to avoid the interaction between neighboring slabs. To acquire Fe-Ni<sub>2</sub>P/CeO<sub>2</sub> heterostructure interface, the CeO<sub>2</sub> (111) surface was modeled by a periodic three-layer slab with the O-termination. The origin Fe-Ni<sub>2</sub>P (001) slab was expanded by a 2 × 2 supercell. After that, the Fe-Co<sub>2</sub>P/CeO<sub>2</sub> interface was created by placing Fe-Ni<sub>2</sub>P (001) slab onto CeO<sub>2</sub> (111) slab. To simplify the calculation, the interface cell with (010) surface was cleaved. The Brillouin-zone (BZ) integration was carried out using Gamma sampling method with a density of 3 × 2 × 1 for geometry optimization.

Adsorption energy was calculated as following:

$$G = E + E_{\text{ZPE}} - TS$$

Where the  $E$ ,  $E_{\text{ZPE}}$  and  $S$  denote the adsorption energy, the difference of zero-point energy and the entropy change, which can be get from the vibration energy of intermediates and gas molecules.<sup>5</sup>

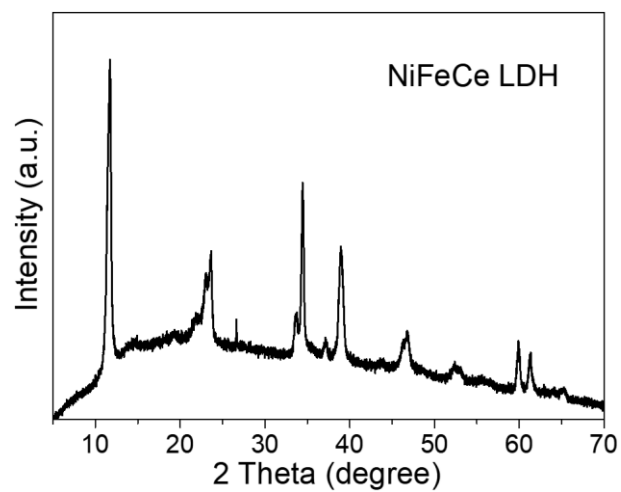

**Fig. S1** XRD pattern of NiFeCe LDH precursor.

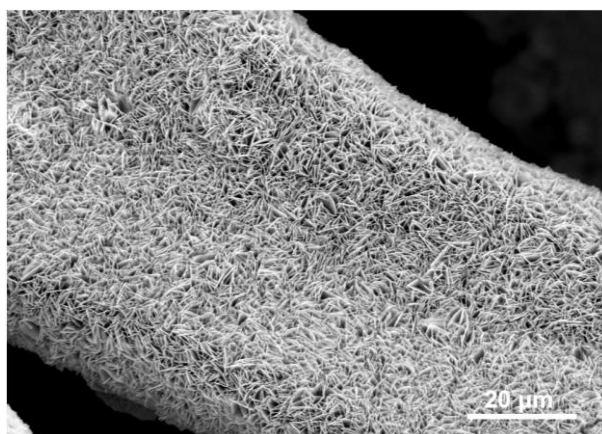

**Fig. S2** SEM image of Fe-Ni<sub>2</sub>P/CeO<sub>2</sub>.

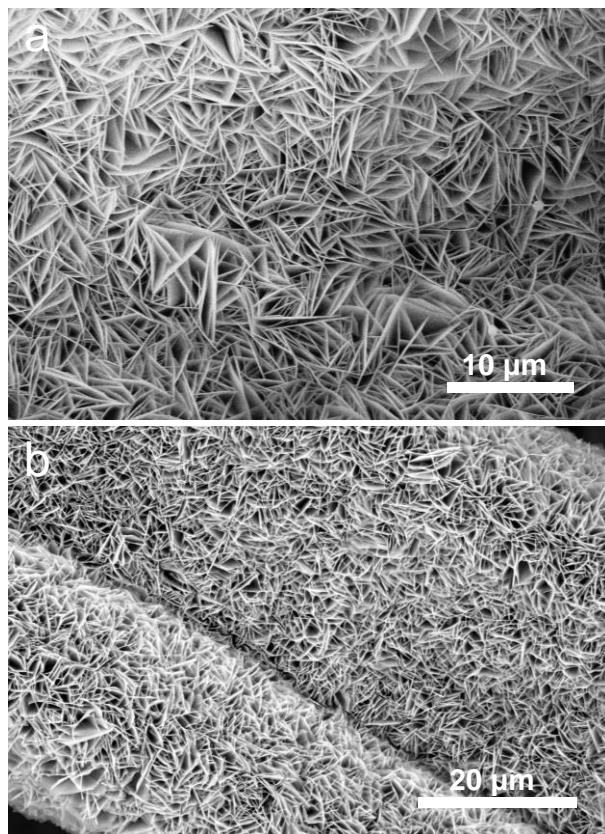

**Fig. S3** SEM images of (a)  $\text{Ni}_2\text{P}$  and (b)  $\text{Fe-Ni}_2\text{P}$ .

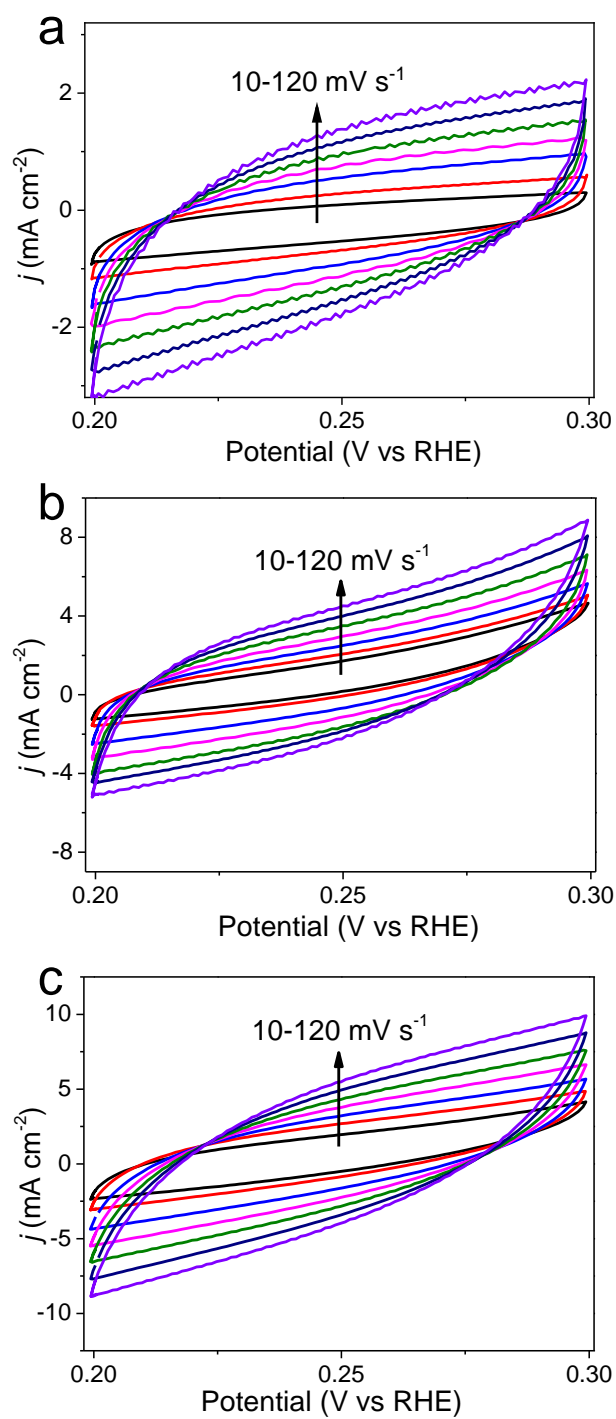

**Fig. S4** CV curves of (a)  $\text{Ni}_2\text{P}$ , (b)  $\text{Fe-Ni}_2\text{P}$  and (c)  $\text{Fe-Ni}_2\text{P/CeO}_2$ .

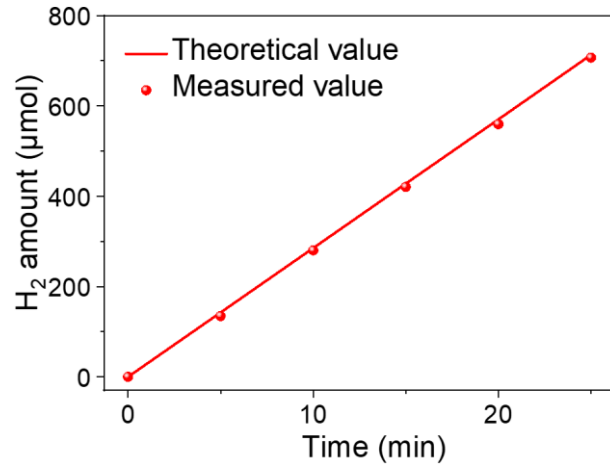

**Fig. S5** Experimental and theoretical calculated amount of H<sub>2</sub> over the Fe-Ni<sub>2</sub>P/CeO<sub>2</sub>.

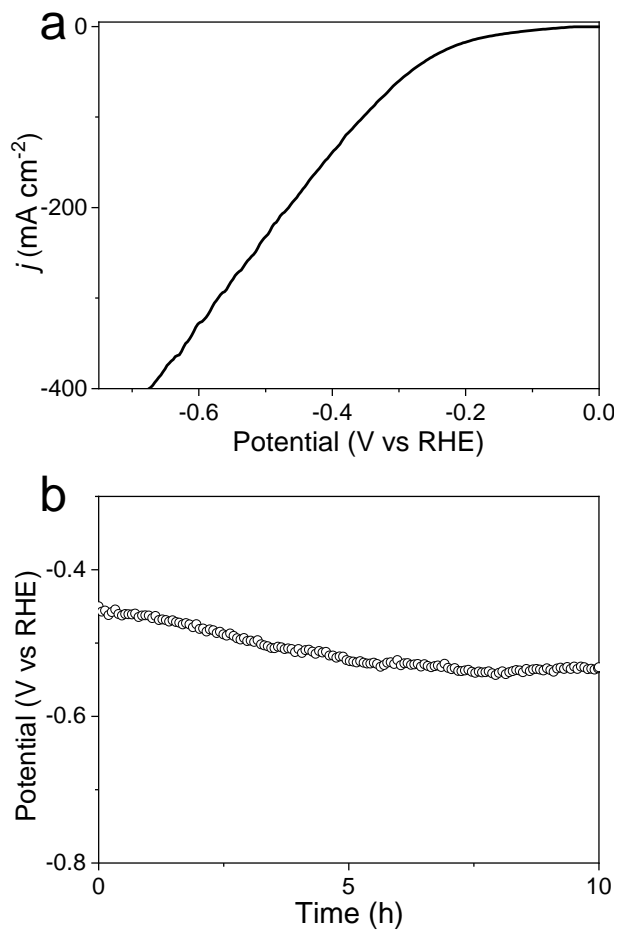

**Fig. S6** (a) Polarization curves (b) durability test of Fe-Ni<sub>2</sub>P/CeO<sub>2</sub> in 1M PBS.

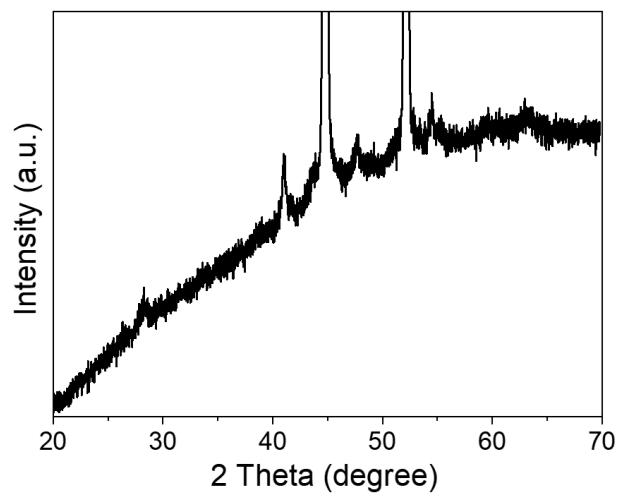

**Fig. S7** XRD pattern of Fe-Ni<sub>2</sub>P/CeO<sub>2</sub> after the HER measurement.

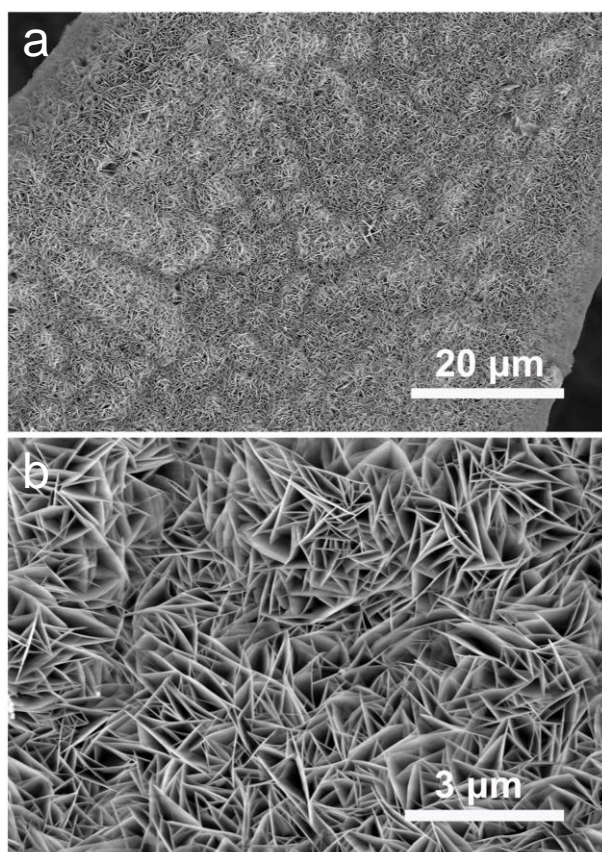

**Fig. S8** SEM images of Fe-Ni<sub>2</sub>P/CeO<sub>2</sub> after the HER measurement.



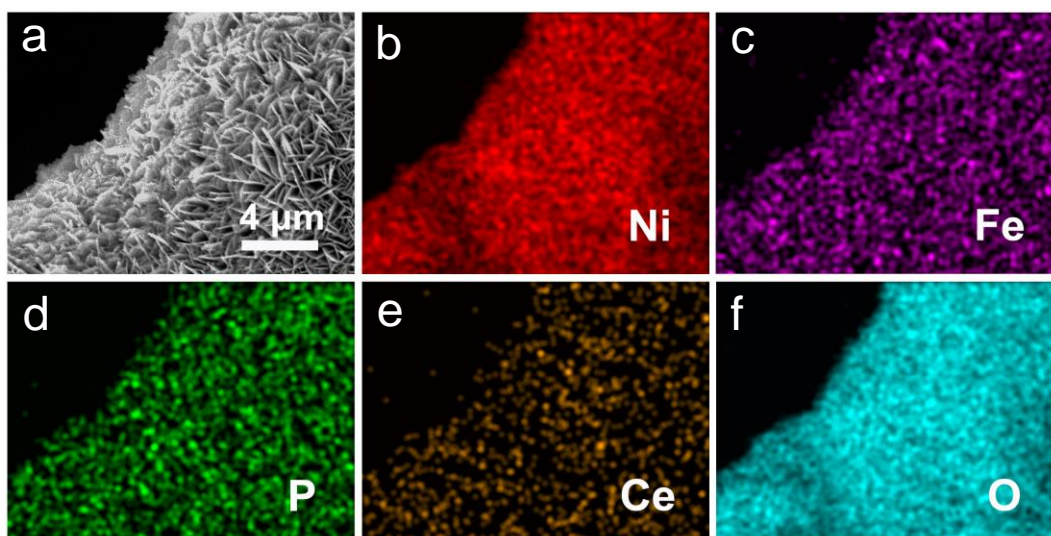

**Fig. S9** SEM and corresponding elemental mapping images of Fe-Ni<sub>2</sub>P/CeO<sub>2</sub> after the HER measurement.

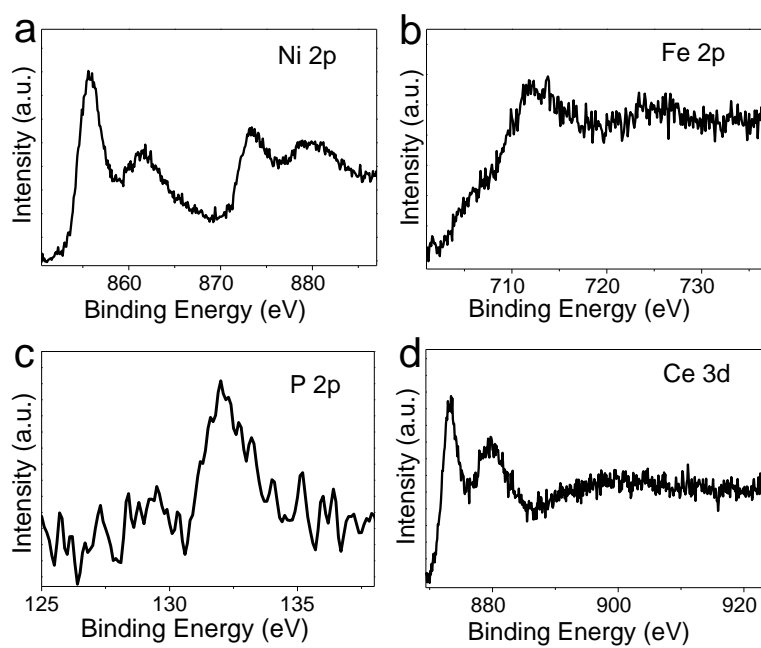

**Fig. S10** XPS spectra of Fe-Ni<sub>2</sub>P/CeO<sub>2</sub> after the HER measurement.



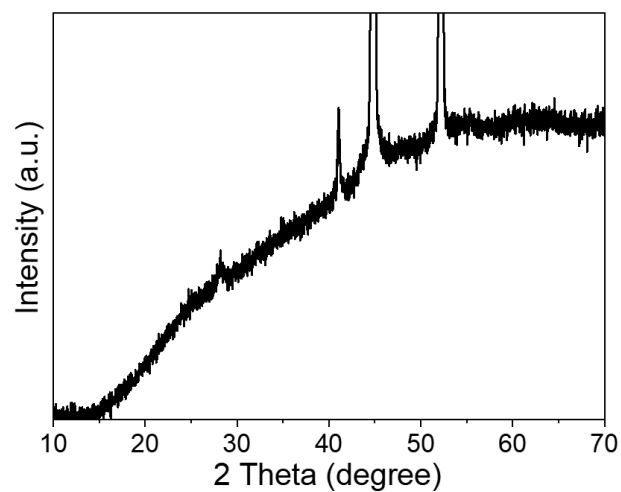

**Fig. S11** XRD pattern of Fe-Ni<sub>2</sub>P/CeO<sub>2</sub> after the HzOR measurement.

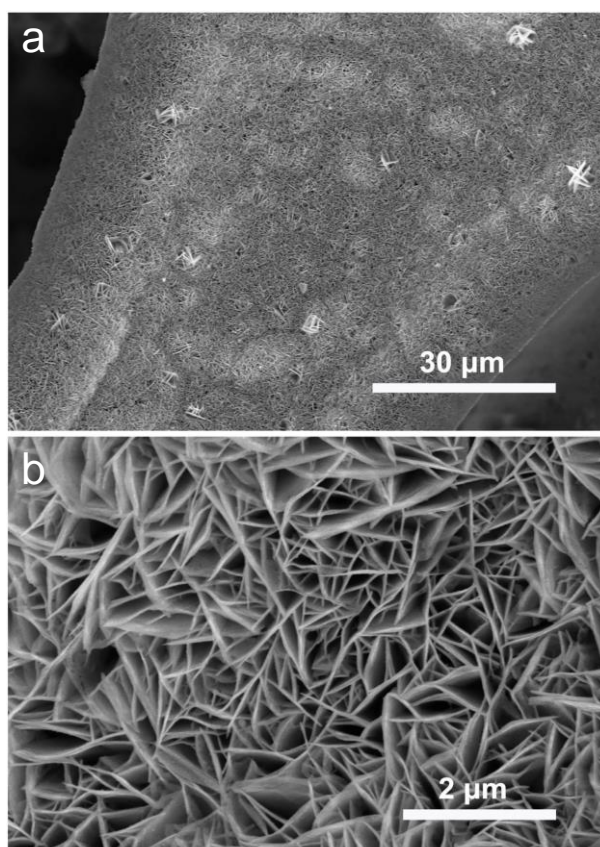

**Fig. S12** SEM images of Fe-Ni<sub>2</sub>P/CeO<sub>2</sub> after the HzOR measurement.

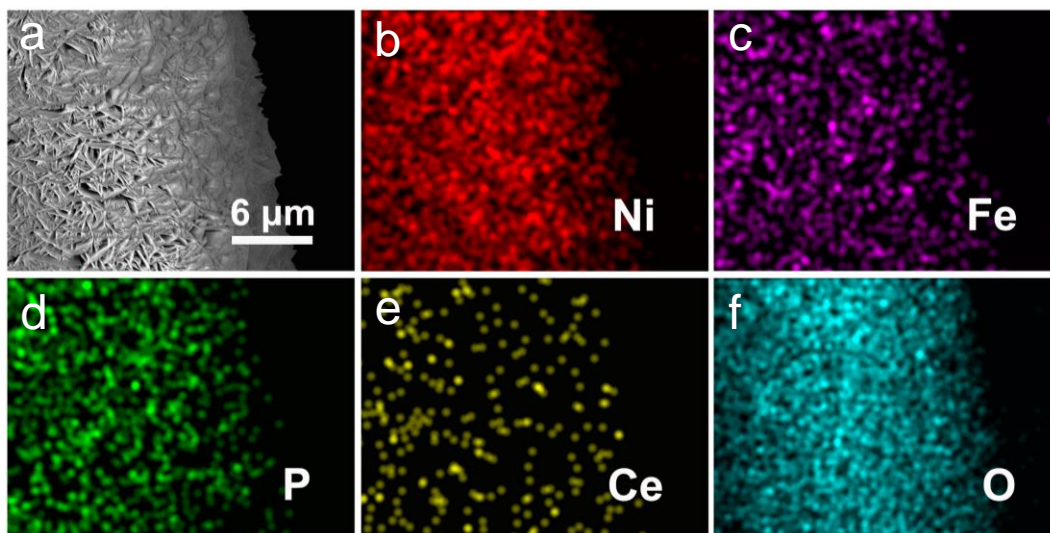

**Fig. S13** SEM and corresponding elemental mapping images of Fe-Ni<sub>2</sub>P/CeO<sub>2</sub> after the HzOR measurement.

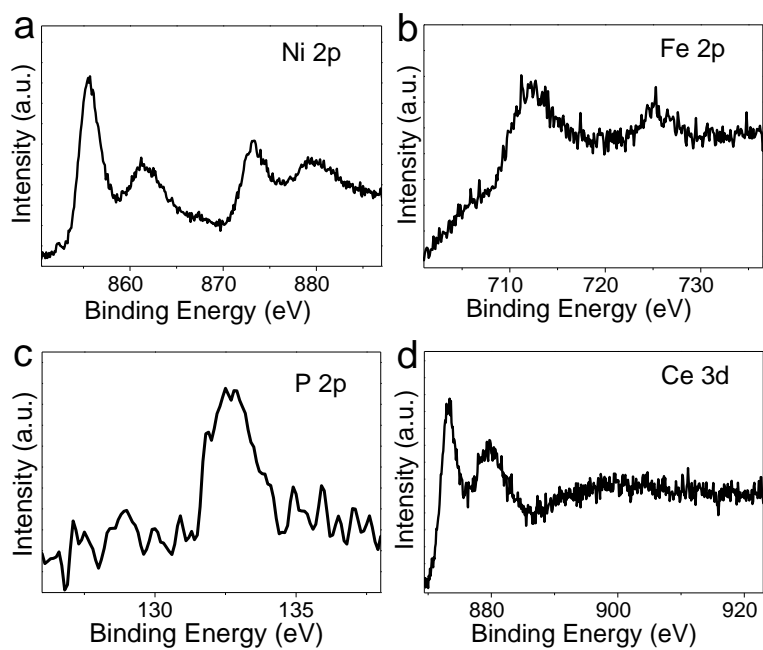

**Fig. S14** XPS spectra of Fe-Ni<sub>2</sub>P/CeO<sub>2</sub> after the HzOR measurement.

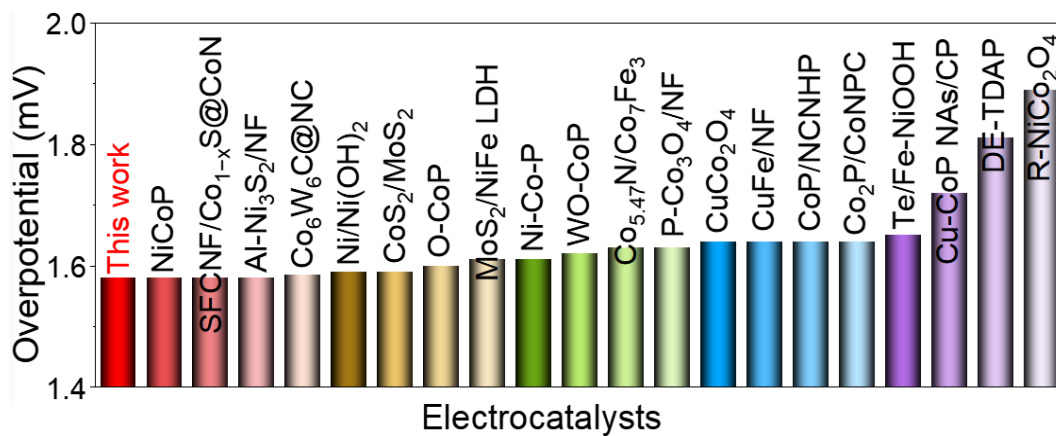

**Fig. S15** Comparison of OWS performances of Fe-Ni<sub>2</sub>P/CeO<sub>2</sub> with developed catalysts.

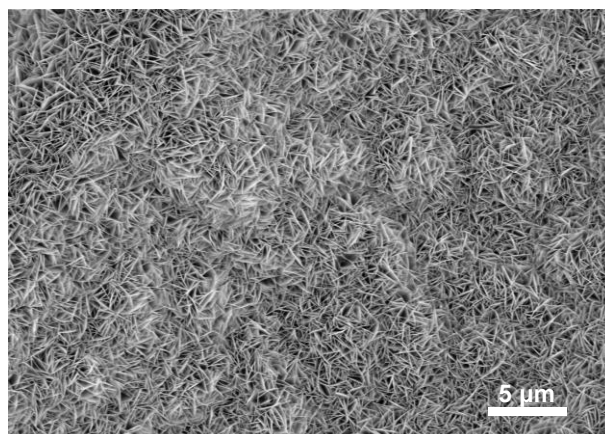

**Fig. S16** SEM image of Fe-Ni<sub>2</sub>P/CeO<sub>2</sub> at the cathode after the OH<sub>2</sub>S test.

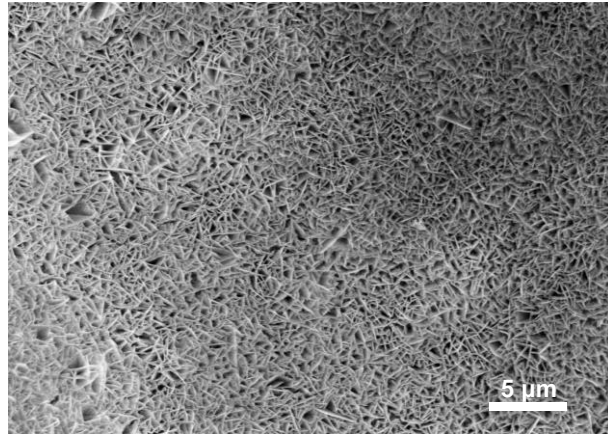

**Fig. S17** SEM image of Fe-Ni<sub>2</sub>P/CeO<sub>2</sub> at the anode after the OHzS test.

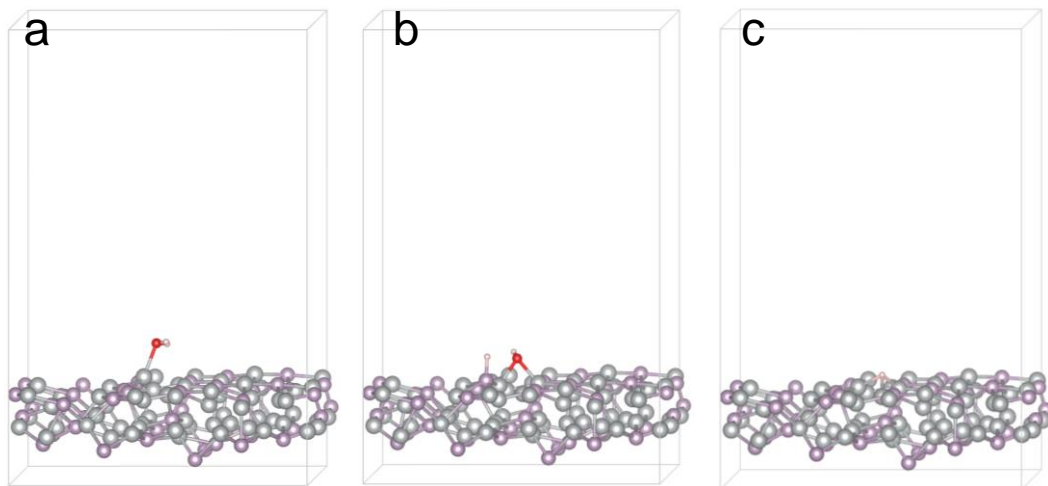

**Fig. S18** The structural model of adsorption and dissociation of water molecule and H\* on the Ni<sub>2</sub>P.

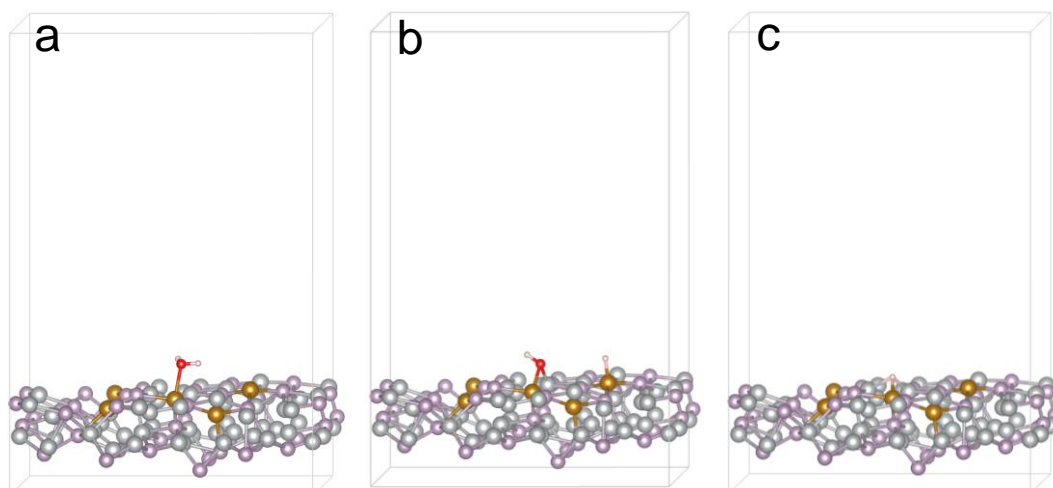

**Fig. S19** The structural model of adsorption and dissociation of water molecule and H\* on the Fe-Ni<sub>2</sub>P.

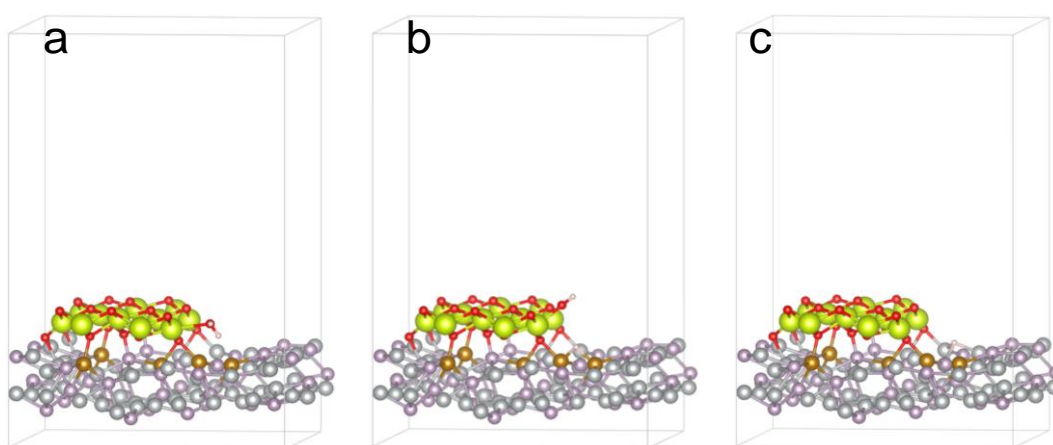

**Fig. S20** The structural model of adsorption and dissociation of water molecule and H\* on the Fe-Ni<sub>2</sub>P/CeO<sub>2</sub>.

**Table S1** The comparison of HER performance of Fe-Ni<sub>2</sub>P/CeO<sub>2</sub> with recently reported materials.

| Catalysts                                             | Overpotential (mV) | Reference        |
|-------------------------------------------------------|--------------------|------------------|
| <b>Fe-Ni<sub>2</sub>P/CeO<sub>2</sub></b>             | <b>67</b>          | <b>This work</b> |
| NiMoP/NF                                              | 68                 | 6                |
| CoP·5CoMoP                                            | 72                 | 7                |
| Co-P@PC                                               | 76                 | 8                |
| NiFeP-NW                                              | 83                 | 9                |
| PMO <sub>12</sub> -MA                                 | 89                 | 10               |
| MoS <sub>2</sub> ML                                   | 90                 | 11               |
| Mo,Fe-NiCoP <sub>x</sub> /NF                          | 99                 | 12               |
| NiCoN/C                                               | 103                | 13               |
| Ni-N <sub>3</sub>                                     | 103                | 14               |
| Fe(OH) <sub>x</sub> @Cu-MOF                           | 112                | 15               |
| NiFeP/SG                                              | 115                | 15               |
| Mo <sub>2</sub> CT <sub>x</sub> /2H-MoS <sub>2</sub>  | 119                | 17               |
| Ti <sub>3</sub> CN(OH) <sub>x</sub> @MoS <sub>2</sub> | 120                | 18               |
| MC-M <sub>2</sub> C/PNCDS                             | 121                | 19               |
| c-NiP <sub>2</sub> /m-NiP <sub>2</sub>                | 134                | 20               |
| P-CoNi <sub>2</sub> S <sub>4</sub>                    | 135                | 21               |
| MoP/NPG                                               | 150                | 22               |
| Mo-Co <sub>0.85</sub> Se <sub>VSe</sub> /NC           | 151                | 23               |
| Mn-Ni <sub>2</sub> P/NiFe LDH                         | 184                | 24               |
| H-TaS <sub>2</sub>                                    | 230                | 25               |

**Table S2** The comparison of HzOR performance of Fe-Ni<sub>2</sub>P/CeO<sub>2</sub> with recently reported materials.

| Catalysts                                          | Potential (mV) | Reference        |
|----------------------------------------------------|----------------|------------------|
| <b>Fe-Ni<sub>2</sub>P/CeO<sub>2</sub></b>          | <b>-117</b>    | <b>This work</b> |
| Ni <sub>3</sub> N-Co <sub>3</sub> N                | -88            | 26               |
| N-fcc-Rh                                           | -81            | 27               |
| WS <sub>2</sub> /Ru                                | -74            | 28               |
| CoP/Co                                             | -69            | 29               |
| Ru <sub>1</sub> -NiCoP                             | -60            | 30               |
| PW-Co <sub>3</sub> N                               | -55            | 31               |
| Cu <sub>1</sub> Co <sub>2</sub> -Ni <sub>2</sub> P | -52            | 32               |
| Ru-Cu <sub>2</sub> O/CF                            | -41            | 33               |
| FeWO <sub>4</sub> -WO <sub>3</sub> /NF             | -34            | 34               |
| Ni NCNAs                                           | -26            | 25               |
| Ni-C HNSA                                          | -20            | 36               |
| NiMo/Ni <sub>2</sub> P                             | -17            | 37               |
| Ni(OH) <sub>2</sub> /Ni <sub>2</sub> P/NF          | -14            | 38               |
| Rh <sub>2</sub> P uNSs                             | -10            | 39               |
| FHNNP/NF                                           | -8             | 40               |
| Mo-Ni <sub>3</sub> N/Ni/NF                         | -0.3           | 41               |
| Cu <sub>1</sub> Ni <sub>2</sub> -N                 | 0.5            | 42               |
| Co/BNC                                             | 95             | 43               |
| Ni <sub>2</sub> P/Co <sub>2</sub> P                | 230            | 44               |
| Ir-SA/NC                                           | 390            | 45               |



**Table S3** The comparison of OWS performance of Fe-Ni<sub>2</sub>P/CeO<sub>2</sub> with recently reported materials.

| Catalysts                                            | Voltage (V) | Reference |
|------------------------------------------------------|-------------|-----------|
| Fe-Ni <sub>2</sub> P/CeO <sub>2</sub>                | 1.582       | This work |
| NiCoP                                                | 1.58        | 46        |
| SFCNF/Co <sub>1-x</sub> S@CoN                        | 1.58        | 47        |
| Al-Ni <sub>3</sub> S <sub>2</sub> /NF                | 1.58        | 48        |
| Co <sub>6</sub> W <sub>6</sub> C@NC                  | 1.585       | 49        |
| Ni/Ni(OH) <sub>2</sub>                               | 1.59        | 50        |
| CoS <sub>2</sub> /MoS <sub>2</sub>                   | 1.59        | 51        |
| O-CoP                                                | 1.60        | 52        |
| MoS <sub>2</sub> /NiFe LDH                           | 1.61        | 53        |
| Ni-Co-P                                              | 1.61        | 54        |
| WO-CoP                                               | 1.62        | 55        |
| Co <sub>5.47</sub> N/Co <sub>7</sub> Fe <sub>3</sub> | 1.63        | 56        |
| P-Co <sub>3</sub> O <sub>4</sub> /NF                 | 1.63        | 57        |
| CuCo <sub>2</sub> O <sub>4</sub>                     | 1.64        | 58        |
| CuFe/NF                                              | 1.64        | 59        |
| CoP/NCNHP                                            | 1.64        | 60        |
| R-NiCo <sub>2</sub> O <sub>4</sub>                   | 1.64        | 61        |
| Te/Fe-NiOOH                                          | 1.65        | 62        |
| Mo-CoP                                               | 1.70        | 63        |
| Cu-CoP NAs/CP                                        | 1.72        | 64        |
| DE-TDAP                                              | 1.81        | 65        |

**Table S4** The comparison of OHZS performance of Fe-Ni<sub>2</sub>P/CeO<sub>2</sub> with recently reported materials.

| Catalysts                                          | Voltage (V) | Reference |
|----------------------------------------------------|-------------|-----------|
| Fe-Ni <sub>2</sub> P/CeO <sub>2</sub>              | 51          | This work |
| Mo-Ni <sub>3</sub> N/Ni/NF                         | 55          | 41        |
| Rh/RhO <sub>x</sub>                                | 68          | 66        |
| Ni <sub>3</sub> N-Co <sub>3</sub> N                | 71          | 26        |
| a-RhPb NFs                                         | 95          | 67        |
| Co/BNC                                             | 103         | 43        |
| Rh <sub>2</sub> S <sub>3</sub> /NC                 | 108         | 68        |
| Mn-CoS <sub>2</sub>                                | 111         | 69        |
| RhIr MNs                                           | 130         | 70        |
| Mo-Ni <sub>2</sub> P <sub>v</sub> @MNF             | 133         | 71        |
| RuFe-Ni <sub>2</sub> P@NF                          | 140         | 72        |
| Co(OH) <sub>2</sub> /MoS <sub>2</sub> /CC          | 142         | 73        |
| Cu <sub>1</sub> Co <sub>2</sub> -Ni <sub>2</sub> P | 160         | 32        |
| CoSe <sub>2</sub>                                  | 164         | 74        |
| FHNNP/NF                                           | 220         | 40        |
| Cu <sub>1</sub> Ni <sub>2</sub> -N                 | 240         | 42        |
| PW-Co <sub>3</sub> N                               | 358         | 31        |
| Rh <sub>2</sub> P uNSs                             | 377         | 39        |
| Ir-SA/NC                                           | 390         | 45        |
| Mn-SA/BNC                                          | 410         | 75        |
| Cu <sub>1</sub> Pd <sub>3</sub> /C                 | 505         | 76        |

## References

- 1 G. Kresse, *Phys. Rev. B*, 1996, **54**, 11169.
- 2 G. Kresse and D. Joubert, *Phys. Rev. B*, 1999, **59**, 1758.
- 3 J. Perdew, B. Kieron and E. Matthias, *Phys. Rev. Lett.*, 1996, **77**, 3865.
- 4 P. Blöchl, *Phys. Rev. B*, 1994, **50**, 17953.
- 5 V. Wang, N. Xu, J. Liu, G. Tang and W. Geng, *Computer Phys. Commun.*, 2021, **267**, 108033.
- 6 H. Roh, H. Jung, H. Choi, J. Han, T. Park, S. Kim and K. Yong, *Appl. Catal. B-Environ.*, 2021, **297**, 120434.
- 7 T. Zhang, Y. Wang, J. Yuan, K. Fang and A. Wang, *J. Colloid Interf. Sci.*, 2022, **615**, 465.
- 8 J. Wu, D. Wang, S. Wan, H. Liu, C. Wang and X. Wang, *Small*, 2020, **16**, 1900550.
- 9 J. Liu, X. Liu, H. Shi, J. Luo, L. Wang, J. Liang, S. Li, L. Yang, T. Wang, Y. Huang and Q. Li, *Appl. Catal. B-Environ.*, 2022, **302**, 120862.
- 10 Y. Gu, A. Wu, Y. Jiao, H. Zheng, X. Wang, Y. Xie, L. Wang, C. Tian and H. Fu, *Angew. Chem. Int. Ed.*, 2021, **60**, 6673.
- 11 J. Qu, Y. Li, F. Li, T. Li, X. Wang, Y. Yin, L. Ma, O. Schmidt and F. Zhu, *ACS Nano*, 2022, **16**, 2, 2921.
- 12 X. An, L. Quan, J. Liu, Q. Tang, H. Lan and H. Liu, *J. Colloid Interf. Sci.*, 2022, **615**, 456.
- 13 J. Lai, B. Huang, Y. Chao, X. Chen and S. Guo, *Adv. Mater.*, 2019, **31**, 1805541.
- 14 W. Zang, T. Sun, T. Yang, S. Xi, M. Waqar, Z. Kou, Z. Lyu, Y. Feng, J. Wang and S. Pennycook, *Adv. Mater.*, 2021, **33**, 2003846.
- 15 W. Cheng, H. Zhang, D. Luan and X. Lou, *Sci. Adv.*, 2021, **7**, 2580.
- 16 R. Li, B. Wang, T. Gao, R. Zhang, C. Xu, X. Jiang, J. Zeng, Y. Bando, P. Hu, Y. Li and X. Wang, *Nano Energy*, 2019, **58**, 870.
- 17 K. Rui, G. Lim, A. Handoko, L. Johnson, X. Meng, M. Lin, G. Subramanian, B. Anasori, Y. Gogotsi, A. Vojvodic and Z. She, *ACS Nano*, 2020, **14**, 16140.
- 18 J. Jiang, F. Li, S. Bai, Y. Wang, K. Xiang, H. Wang, J. Zou and J. Hsu, *Nano Res.*, 2023, **16**, 4656.
- 19 X. Lu, L. Yu, J. Zhang and X. Lou, *Adv. Mater.*, 2019, **31**, 1900699.
- 20 Q. Fu, X. Wang, J. Han, J. Zhong, Z. Tongrui, T. Yao, C. Xu, T. Gao, S. Xi, C. Liang, L. Xu, P. Xu and B. Song, *Angew. Chem., Int. Ed.*, 2021, **133**, 263.
- 21 X. Lu, S. Zhang, W. Sim, S. Gao and X. Lou, *Angew. Chem. Int. Ed.*, 2021, **133**, 23067.
- 22 R. Gea, J. Huo, T. Liao, Y. Liud, M. Zhua, Y. Li, J. Zhang and W. Li, *Appl. Catal. B-Environ.*, 2020, **260**, 118196.
- 23 Q. Dai, L. Wang, K. Wang, X. Sang, Z. Li, B. Yang, J. Chen, L. Lei, L. Dai and Y. Hou, *Adv. Funct. Mater.*, 2022, **32**, 2109556.
- 24 B. Sang, Y. Liu, X. Wan, S. Xie, G. Zhang, M. Ge, J. Dai, W. Zhang and R. Li, *Chem. Commun.*, 2023, **59**, 8743.
- 25 L. Najafi, S. Bellani, R. Oropesa-Nuñez, B. Martín-García, M. Prato, L. Pasquale, J. Panda, P. Marvan, Z. Sofer and F. Bonaccorso, *ACS Catal.*, 2020, **10**, 3313.
- 26 Q. Qian, J. Zhang, J. Li, Y. Li, X. Jin, Y. Zhu, Y. Liu, Z. Li, A. El-Harairy, C. Xiao, G. Zhang and Y. Xie, *Angew. Chem. Int. Ed.*, 2021, **133**, 6049.
- 27 J. Shi, Q. Sun, J. Chen, W. Zhu, T. Cheng, M. Ma, Z. Fan, H. Yang, F. Liao, M. Shao and Z. Kang, *Appl. Catal. B-Environ.*, 2024, **343**, 123561.
- 28 J. Li, Y. Li, J. Wang, C. Zhang, H. Ma, C. Zhu, D. Fan, Z. Guo, M. Xu, Y. Wang and H. Ma, *Adv. Funct. Mater.*, 2022, **32**, 2109439.

- 29 S. Chen, C. Wang, S. Liu, M. Huang, J. Lu, P. Xu, H. Tong, L. Hu and Q. Chen, *J. Phys. Chem. Lett.*, 2021, **12**, 4849.
- 30 Y. Hu, T. Chao, Y. Li, P. Liu, T. Zhao, G. Yu, C. Chen, X. Liang, H. Jin, S. Niu, W. Chen, D. Wang and Y. Li, *Angew. Chem. Int. Ed.*, 2023, **135**, e202308800.
- 31 Y. Zhu, J. Zhang, Q. Qian, Y. Li, Z. Li, Y. Liu, C. Xiao, G. Zhang and Y. Xie, *Angew. Chem. Int. Ed.*, 2022, **61**, e202113082.
- 32 C. Feng, M. Lv, J. Shao, H. Wu, W. Zhou, S. Qi, C. Deng, X. Chai, H. Yang, Q. Hu and C. He, *Adv. Mater.*, 2023, **35**, 2305598.
- 33 P. Shen, B. Zhou, Z. Chen, W. Xiao, Y. Fu, J. Wan, Z. Wu and L. Wang, *Appl. Catal. B-Environ.*, 2023, **325**, 122305.
- 34 F. Shen, Z. Wang, Y. Wang, G. Qian, M. Pan, L. Luo, G. Chen, H. Wei and S. Yin, *Nano Res.*, 2021, **14**, 4356.
- 35 Y. Li, J. Li, Q. Qian, X. Jin, Y. Liu, Z. Li, Y. Zhu, Y. Guo and G. Zhang, *Small*, 2021, **17**, 2008148.
- 36 Y. Liu, J. Zhang, Y. Li, Q. Qian, Z. Li, Y. Zhu and G. Zhang, *Nature Commun.*, 2020, **11**, 1853.
- 37 Y. Yang, X. Li, G. Liu, H. Liu, Y. Shi, C. Ye, Z. Fang, M. Ye and J. Shen, *Adv. Mater.*, 2023, **36**, 2307979.
- 38 H. Yang, H. Wang, M. Sun and Z. Yuan, *Chem. Eng. J.*, 2023, **475**, 146134.
- 39 Y. Zhao, N. Jia, X. Wu, F. Li, P. Chen, P. Jin, S. Yin and Y. Chen, *Appl. Catal. B-Environ.*, 2020, **270**, 118880.
- 40 S. Zhang, X. Wei, S. Dai, H. Wang and M. Huang, *Adv. Funct. Mater.*, 2023, 2311370.
- 41 Y. Liu, J. Zhang, Y. Li, Q. Qian, Z. Li and G. Zhang, *Adv. Funct. Mater.*, 2021, **31**, 2103673.
- 42 Z. Wang, L. Xu, F. Huang, L. Qu, J. Li, K. Owusu, Z. Liu, Z. Lin, B. Xiang, X. Liu, K. Zhao, X. Liao, W. Yang, Y. Cheng and L. Mai, *Adv. Energy Mater.*, 2019, **9**, 1900390.
- 43 J. Ding, D. Guo, A. Hu, X. Yang, K. Shen, L. Chen and Y. Li, *Nano Res.*, 2023, **16**, 6067.
- 44 H. Wang, L. Wang, J. Ren, W. Tian, M. Sun, Y. Feng and Z. Yuan, *ACS Nano*, 2023, **17**, 10965.
- 45 F. Luo, S. Pan, Y. Xie, C. Li, Y. Yu, H. Bao and Z. Yang, *Adv. Sci.*, 2023, **10**, 2305058.
- 46 H. Liang, A. Gandi, D. Anjum, X. Wang, U. Schwingenschlögl and H. Alshareef, *Nano Lett.*, 2016, **16**, 7718.
- 47 W. He, F. Wang, D. Jia, Y. Li, L. Liang, J. Zhang, Q. Hao, C. Liu, H. Liu and J. Zhao, *Nanoscale*, 2020, **12**, 24244.
- 48 D. Guo, J. Wang, L. Zhang, X. Chen, Z. Wan and B. Xi, *Small*, 2020, **16**, 2002432.
- 49 J. Chen, B. Ren, H. Cui and C. Wang, *Small*, 2020, **16**, 1907556.
- 50 L. Dai, Z. Chen, L. Li, P. Yin, Z. Liu and H. Zhang, *Adv. Mater.*, 2019, **32**, 1906915.
- 51 G. Zhou, X. Wu, M. Zhao, H. Pang, L. Xu, J. Yang and Y. Tang, *ChemSusChem*, 2021, **14**, 699.
- 52 G. Zhou, M. Li, Y. Li, H. Dong, D. Sun, X. Liu, L. Xu, Z. Tian and Y. Tang, *Adv. Funct. Mater.*, 2020, **30**, 1905252.
- 53 X. Li, L. Zheng, S. Liu, T. Ouyang, S. Ye and Z. Liu, *Chinese Chem. Lett.*, 2022, **33**, 4761.
- 54 E. Hu, Y. Feng, J. Nai, D. Zhao, Y. Hu and X. Lou, *Energy Environ. Sci.*, 2018, **11**, 872.
- 55 G. Meng, Z. Chang, L. Zhu, C. Chen, Y. Chen, H. Tian, W. Luo, W. Sun, X. Cui and J. Shi, *Nano-Micro Lett.*, 2023, **15**, 212.
- 56 G. Zhou, G. Liu, X. Liu, Q. Yu, H. Mao, Z. Xiao and L. Wang, *Adv. Funct. Mater.*, 2022, **32**, 2107608.
- 57 Z. Wang, H. Liu, R. Ge, X. Ren, J. Ren, D. Yang, L. Zhang and X. Sun, *ACS Catal.*, 2018, **8**, 2236.
- 58 A. Ahmed, S. Pawar, A. Inamdar, H. Kim and H. Im, *Adv. Mater. Interf.*, 2020, **7**, 1901515.

- 59 A. Inamdar, H. Chavan, B. Hou, C. Lee, S. Lee, S. Cha, H. Kim and H. Im, *Small*, 2020, **16**, 1905884.
- 60 Y. Pan, K. Sun, S. Liu, X. Cao, K. Wu, W. Cheong, Z. Chen, Y. Wang, Y. Li, Y. Liu, D. Wang, Q. Peng, C. Chen and Y. Li, *J. Am. Chem. Soc.*, 2018, **140**, 2610.
- 61 S. Peng, F. Gong, L. Li, D. Yu, D. Ji, T. Zhang, Z. Hu, Z. Zhang, S. Chou, Y. Du and S. Ramakrishna, *J. Am. Chem. Soc.*, 2018, **140**, 13644.
- 62 S. Ibraheem, X. Li, S. Shah, T. Najam, G. Yasin, R. Iqbal, S. Hussain, W. Ding and F. Shahzad, *ACS Appl. Mater. Interfaces*, 2021, **13**, 10972.
- 63 L. Li, Y. Guo, X. Wang, X. Liu and Y. Lu, *Langmuir*, 2021, **37**, 5986.
- 64 L. Yan, B. Zhang, J. Zhu, Y. Li, P. Tsiakaras and P. Shen, *Appl. Catal. B-Environ.*, 2020, **265**, 118555.
- 65 G. Yasin, S. Ibraheem, S. Ali, M. Arif, S. Ibrahim, R. Iqbal, A. Kumar, M. Tabish, M.A. Mushtaq, A. Saad, H. Xu and W. Zhao, *Materialstoday*, 2022, **23**, 100634.
- 66 J. Yang, L. Xu, W. Zhu, M. Xie, F. Liao, T. Cheng, Z. Kang and M. Shao, *J. Mater. Chem. A*, 2022, **10**, 1891.
- 67 W. Tian, X. Zhang, Z. Wang, L. Cui, M. Li, Y. Xu, X. Li, L. Wang and H. Wang, *Chem. Eng. J.*, 2022, **440**, 135848.
- 68 C. Zhang, H. Liu, Y. Liu, X. Liu, Y. Mi, R. Guo, J. Sun, H. Bao, J. He, Y. Qiu, J. Ren, X. Yang, J. Luo and G. Hu, *Small Methods*, 2020, **4**, 2000208.
- 69 J. Hou, X. Peng, J. Sun, S. Zhang, Q. Liu, X. Wang, J. Luo and X. Liu, *Inorg. Chem. Front.*, 2022, **9**, 3047.
- 70 M. Zhang, Z. Wang, Z. Duan, S. Wang, Y. Xu, X. Li, L. Wang and H. Wang, *J. Mater. Chem. A*, 2021, **9**, 18323.
- 71 J. Chi, L. Guo, J. Mao, T. Cui, J. Zhu, Y. Xia, J. Lai and L. Wang, *Adv. Funct. Mater.*, 2023, **33**, 2300625.
- 72 X. Zhai, Q. Yu, J. Chi, X. Wang, B. Li, B. Yang, Z. Li, J. Lai and L. Wang, *Nano Energy*, 2023, **105**, 108008.
- 73 X. Cheng and Y. Tong, *ACS Sustainable Chem. Eng.*, 2023, **11**, 3219.
- 74 J. Zhang, H. Wang, Y. Tian, Y. Yan, Q. Xue, T. He, H. Liu, C. Wang, Y. Chen and B. Xia, *Angew. Chem. Int. Ed.*, 2018, **57**, 7649.
- 75 X. Peng, J. Hou, Y. Mi, J. Sun, G. Qi, Y. Qin, S. Zhang, Y. Qiu, J. Luo and X. Liu, *Nanoscale*, 2021, **13**, 4767.
- 76 Y. Jeong, S. Naik, Y. Yu, J. Theerthagiri, S. Lee, P. Show, H. Choi and M. Choi, *J. Mater. Sci. Technol.*, 2023, **143**, 20.
